# Supplementary material
Source: PubMed Central journal article supplement (PMC4209186)
Supplement: NIHMS610180-supplement-SD1.pdf [file NIHMS610180-supplement-SD1.pdf]

## Methods

### Mice.

All animals were housed and handled according to the guidelines established by the Direction Générale de la Santé of the canton of Geneva. *RIP-DTR* and *Glucagon-rtTA*<sup>1</sup>, *TetO-Cre*<sup>2</sup>, *R26-EYFP*<sup>3</sup>, *R26-dTomato*<sup>4</sup>, *Ngn3-YFP*<sup>5</sup>, *RIP-Cre*<sup>6</sup>, *Ngn3-tTA* and *Tre-Ngn3*<sup>7</sup>, *R26-iDTR*<sup>8</sup>, and *Ngn3-CreERT*<sup>9</sup> mice were previously described. F. Reimann and F. M. Gribble generated the *Somatostatin-Cre* mice. This line bears an *Sst-mCherry-2A-iCre* transgene. The *Sst* promoter was cloned from BAC bQ73b10, with NOD background; initially a *rpsLneo* sequence (Genebridges) providing kanamycin resistance and streptomycin sensitivity was introduced after the STOP codon in *Sst*-exon2 and subsequently all sequence between the *Sst*-START codon in exon1 and the *rpsLneo* sequence was replaced by the *mCherry-2A-iCre* sequence. In the resulting mice, no *mCherry*-fluorescence can be detected on tissue sections; however, when combined with the *R26-EYFP* or *R26-dTomato* transgenes, strong fluorescence can be detected in about 80% of pancreatic  $\delta$ -cells as well as gastric D cells. The *Insulin-mCherry* mice were generated by one of us (G. Gu); in these animals, more than 95% of insulin-expressing cells are *mCherry*<sup>+</sup>. For *Ngn3CreERT* mice, as previously reported, no *Ngn3* or *YFP* expression can be detected in postnatal islets. In juvenile (i.e. prepubescent) mice, islet *Ngn3* expression is upregulated exclusively after  $\beta$ -cell ablation as confirmed by both qPCR (on isolated islets) and with a second transgenic line, the *Ngn3-YFP* knock-ad on mice. The age-specific Cre labeling efficiencies for the different lines used in the manuscript are presented in the following table. For each experiment mice were selected according to gender, general health and genotype. Mice fulfilling these conditions were randomly selected for treatments/controls. No blinding was possible due to regular glycaemia check-up and the obvious phenotype.

| <b><i>Somatostatin-Cre</i> / <i>R26-YFP</i> line</b>                | <b>YFP-labeled <i>Sst</i><sup>+</sup> cells (%)</b> | <b>mice (n)</b> | <b>scored <i>Sst</i><sup>+</sup> cells</b> |
|---------------------------------------------------------------------|-----------------------------------------------------|-----------------|--------------------------------------------|
| Juvenile                                                            | 82.6 ± 6.9                                          | 7               | 3081                                       |
| Adult                                                               | 80.3 ± 6.2                                          | 4               | 1400                                       |
| Aged (not analysed)                                                 | -                                                   | -               | -                                          |
| <b><i>Glucagon-rtTA</i> / <i>TetO-Cre</i> / <i>R26-YFP</i> line</b> | <b>YFP-labeled <i>Glu</i><sup>+</sup> cells (%)</b> | <b>mice (n)</b> | <b>scored <i>Glu</i><sup>+</sup> cells</b> |
| Juvenile                                                            | 88.6 ± 3.6                                          | 5               | 3711                                       |
| Adult                                                               | 86.9 ± 3.3                                          | 3               | 1850                                       |
| Aged                                                                | 85.6 ± 3.2                                          | 4               | 4852                                       |
| <b><i>RIP-Cre</i> / <i>R26-YFP</i> line</b>                         | <b>YFP-labeled <i>Ins</i><sup>+</sup> cells (%)</b> | <b>mice (n)</b> | <b>scored <i>Ins</i><sup>+</sup> cells</b> |
| Juvenile                                                            | 79.7 ± 4.2                                          | 3               | 7516                                       |
| Adult (not analysed)                                                | -                                                   | -               | -                                          |
| Aged (not analysed)                                                 | -                                                   | -               | -                                          |

### **Diphtheria toxin, tamoxifen, doxycycline, streptozotocin, FoxO1 inhibitor (AS1842856) and insulin treatments.**

DT (Sigma) was given in 3 intraperitoneal (i.p.) injections (126 ng of DT per injection, on days 0, 3 and 4), or as single intraperitoneal (i.p.) injection to 2-week-old pups. Injected middle-aged and aged mice were always males; pups of both genders were given DT, however only the males were used in the experiments presented in the manuscript, for homogeneity.

Tamoxifen (TAM) was freshly prepared (Sigma) and administered i.p. (2 doses of 5 mg, 2 days apart). TAM (20 mg) was diluted in 50  $\mu$ l 100% ethanol and 950  $\mu$ l corn oil.

DOX (1 mg.ml<sup>-1</sup>) (Sigma) was added to drinking water for 2 weeks.

Streptozotocin (Sigma) was administered by a single intra-peritoneal (i.p.) injection (200 mg/kg) to 2-week-old pups as previously described<sup>10</sup>.

2-month-old mice were i.p. injected daily, for 5 days, either 30 mg/kg of AS1842856 (a FoxO1 inhibitor; Calbiochem<sup>11,12</sup>) or the vehicle (DMSO).

Mice received subcutaneous implants of insulin (Linbit) when hyperglycemic (>20 mM) in the long-term regeneration experiments.

### **Immunofluorescence.**

Cryostat sections were 10 $\mu$ m-thick. The following antibodies were used:

| Primary antibody                | Dilution | Company                    |
|---------------------------------|----------|----------------------------|
| guinea-pig anti-porcine insulin | 1/400    | Dako                       |
| mouse anti-porcine glucagon     | 1/1,000  | Sigma                      |
| rabbit anti-human somatostatin  | 1/200    | Dako                       |
| mouse anti-human somatostatin   | 1/200    | BCBC (Ab1985)              |
| goat anti-human somatostatin    | 1/200    | SantaCruz                  |
| rabbit anti-human PP            | 1/200    | Bachem                     |
| mouse anti-Ki67                 | 1/200    | BD Transduction Laboratory |
| rabbit anti-GFP                 | 1/200    | Molecular Probes           |
| chicken anti-GFP                | 1/400    | Abcam                      |
| mouse anti-mCherry              | 1/500    | Abcam                      |

Because of known technical difficulties, we were unable to perform Ngn3 immunodetection on adult pancreas sections.

The secondary antibodies were coupled with Alexa 488, 555, 546, 598 or 647 (Molecular Probes, 1:500), or TRITC (Southern Biotech, 1:500). Wherever necessary the secondary detection was performed in two sequential stages (we detected firstly the primary antibody raised in goat by using a donkey anti-goat AlexaFluor secondary antibody then, following extensive washings, we performed a second round of detection using a cocktail of the goat-raised secondary antibodies).

| Secondary antibody                               | Dilution | Company          |
|--------------------------------------------------|----------|------------------|
| goat anti-mouse TRITC (IgG1 – $\gamma$ 1)        | 1/500    | Southern Biotech |
| goat anti-mouse 555 (IgG1 – $\gamma$ 1)          | 1/500    | Molecular Probes |
| goat anti-mouse 647 (IgG1 – $\gamma$ 1)          | 1/500    | Molecular Probes |
| goat anti-rabbit 488 (highly cross-adsorbed)     | 1/500    | Molecular Probes |
| donkey anti-rabbit 594                           | 1/500    | Molecular Probes |
| goat anti-chicken 488                            | 1/500    | Molecular Probes |
| goat anti-guinea pig 488 (highly cross-adsorbed) | 1/500    | Molecular Probes |
| goat anti-guinea pig 568 (highly cross-adsorbed) | 1/500    | Molecular Probes |
| goat anti-guinea pig 647 (highly cross-adsorbed) | 1/500    | Molecular Probes |
| donkey anti-goat 647                             | 1/500    | Molecular Probes |

For the double tracing experiment the following two different combinations of antibodies were used:

| FIRST COMBINATION                                |          |                  |
|--------------------------------------------------|----------|------------------|
| Primary antibodies:                              | Dilution | Source           |
| guinea-pig anti-porcine insulin                  | 1/400    | Dako             |
| chicken anti-GFP                                 | 1/400    | Abcam            |
| mouse anti-mCherry                               | 1/500    | Abcam            |
| rabbit anti-human somatostatin                   | 1/200    | Dako             |
| Secondary antibodies:                            | Dilution | Source           |
| goat anti-guinea pig 647 (highly cross-adsorbed) | 1/500    | Molecular Probes |
| goat anti-chicken 488                            | 1/500    | Molecular Probes |
| goat anti-mouse 555 (IgG1 – $\gamma$ 1)          | 1/500    | Molecular Probes |
| donkey anti-rabbit 594                           | 1/500    | Molecular Probes |

| SECOND COMBINATION                               |          |                  |
|--------------------------------------------------|----------|------------------|
| Primary antibodies:                              | Dilution | Source           |
| guinea-pig anti-porcine insulin                  | 1/400    | Dako             |
| rabbit anti-GFP                                  | 1/200    | Molecular Probes |
| mouse anti-human somatostatin                    | 1/200    | BCBC (Ab1985)    |
| Secondary antibodies:                            | Dilution | Source           |
| goat anti-guinea pig 647 (highly cross-adsorbed) | 1/500    | Molecular Probes |
| goat anti-rabbit 488 (highly cross-adsorbed)     | 1/500    | Molecular Probes |
| goat anti-mouse TRITC (IgG1 – $\gamma$ 1)        | 1/500    | Southern Biotech |

In the second combination,  $\delta$ -cells were traced directly with the endogenous fluorophore, without further antibody amplification, since its intensity was high enough (1 hour 5% PFA for sample fixation).

Sections were analyzed with Leica TCS SPE, SP2 AOBS, Leica TCS SP5 STED CW confocal microscopes and Leica M205FA binocular equipped with a Leica DFC360FX camera, when appropriate. Section area quantifications were performed with *Imaris*, *Volocity* or *ImageJ* programs. Additionally, in a few images the original color of each channel was changed to colors that allow a better visualization of the overlay colocalization (like Extended Data Fig. 8k). No specific feature of the original data was obscured, eliminated or misrepresented.

#### Physiological studies.

Glucose tolerance tests and insulin dosages (immunoassay, ELISA kit mouse insulin ultrasensitive Mercodia) were performed as described <sup>1</sup>. Animals (4 males per group, 5-month-old) were fasted overnight for 12 hours before starting the experiment. Insulin tolerance test was performed as described <sup>13</sup>. Animals (7 males for control and 10 males for DT-treated, 1.5-year-old) were fasted for 5 hours before the experiment. 0.75 U/kg per mice of Novorapid insulin was injected.

#### Transplantations.

Islet transplantations under the kidney capsule were performed as described <sup>14</sup>.

#### Total RNA extraction, cDNA synthesis and qPCR.

Adult and pup islets ( $n \geq 3$ ) were isolated as described <sup>15</sup> and the samples were either directly processed for RNA extraction (1 sample = 1 mouse) or incubated in accutase (Invitrogen) for 12 min. at 37°C to prepare a single-cell suspension, followed by sorting on a FACS Aria2 (BD Biosciences) or Moflo Astrios (Beckman Coulter) system (for  $\beta$ -cell sorting, 1 sample = 1 mouse; for  $\delta$ -cell sorting, 1 sample = pool of 3 mice). For all samples the total RNA was isolated with the Qiagen RNeasy Micro kit (Qiagen #74004). The subsequent cDNA synthesis, qPCR reaction and data analysis, were performed either as described <sup>1</sup> or by using the RT<sup>2</sup> Profiler PCR Array combined to RT<sup>2</sup> SYBR Green ROX FAST Mastermix (QIAGEN) according to the manufacturer's

instructions. Each individual sample (mouse) was run in triplicate, in 3 independent qPCR reactions.

| Gene                            | Primer Sequence                                             |
|---------------------------------|-------------------------------------------------------------|
| <b><math>\beta</math>-actin</b> | F5'AAGGCCAACCGTGAAAAGAT 3'<br>R5'GTGGTACGACCAGAGGGATAC 3'   |
| <b>18S</b>                      | F5'CAGATTGATGGCTCTTTCTCG 3'<br>R5'AGACAAATCGCTCCACCAAC 3'   |
| <b>AKT2</b>                     | F5'AGGTAGCTGTCAACAAGGCA3'<br>R5'CTTGCCGAGGAGTTTGAGAT3'      |
| <b>AR</b>                       | F5'CGAAGTGTGGTATCCTGGTG3'<br>R5'GGTACTGTCCAAACGCATGT3'      |
| <b>ARX</b>                      | F5'TTTTCTAGGAGCAGCGGTGT3'<br>R5'AGTGGAAGAGCCTGCCAA3'        |
| <b>BRN4</b>                     | F5'CATCGAGGTGAGTGTCAAGG3'<br>R5'CAGACACGCACCACTTCTTT3'      |
| <b>CDK2</b>                     | F5'GGACTAGCAAGAGCCTTTGG3'<br>R5'AAGAATTCAGGTGCTCGGT3'       |
| <b>CDKN1a</b>                   | F5'AGTCTCATGGTGTGGTGGAA3'<br>R5'GACATCACCAGGATTGGACA3'      |
| <b>CDKN1b</b>                   | F5'AGTGTCCAGGGATGAGGAAG3'<br>R5'CTTCTGTTCTGTTGGCCCTT3'      |
| <b>CDKN1c</b>                   | F5'AATCAGCCAGCCTTCGAC3'<br>R5'ATCACTGGGAAGGTATCGCT3'        |
| <b>CKS1b</b>                    | F5'TCCATGAACCAGAACCTCAC3'<br>R5'GGCTTCATTTCTTTGGCTTC3'      |
| <b>ESR1</b>                     | F5'GCCTCAATGATGGGCTTATT3'<br>R5'AAAGCCTGGCACTCTCTTTG3'      |
| <b>FOXO1</b>                    | F5'GAGAAGAGGCTCACCTGTC3'<br>R5'ACAGATTGTGGCGAATTGAA3'       |
| <b>GADPH</b>                    | F5'TCCATGACAACTTTGGCATTG3'<br>R5'CAGTCTTCTGGGTGGCAGTGA3'    |
| <b>GCG</b>                      | F5'GAGGAGAACCCAGATCATTCC3'<br>R5'TGTGAGTGGCGTTTGTCTTCA3'    |
| <b>GLUT2</b>                    | F5'CTCGTGGCGCTGATGCT3'<br>R5'CTGGTTGAATAGTAAAATATCCCATTGA3' |
| <b>Insulin2</b>                 | F5'TCAACATGGCCCTGTGGAT3'<br>R5'AAAGGTGCTGCTTGAAAAGC3'       |
| <b>MafA</b>                     | F5'GGAGGTCATCCGACTGAAACA3'                                  |

|               |                                                              |
|---------------|--------------------------------------------------------------|
|               | R5'GCACCTCTCGCTCTCCAGAAT3'                                   |
| <b>MafB</b>   | F5'TGAGCTAGAGGGAGGAAGGA3'<br>R5'CCGGGTTTCTCTAACTCTGC3'       |
| <b>Ngn3</b>   | F5'GTCGGGAGAACTAGGATGGC 3'<br>R5'GGAGCAGTCCCTAGGTATG 3'      |
| <b>Nkx6.1</b> | F5'AGAGAGCACGCTTGGCCTATTC3'<br>R5'GTCGTCAGAGTTCGGGTCCAG3'    |
| <b>Pax4</b>   | F5'GGACAAGGCTCCAGTGTGT3'<br>R5'GCAAGCTCTGGTCTTCCTTGAA3'      |
| <b>PC1/3</b>  | F5'TGGAGTTGCATATAATTCCAAAGTT3'<br>R5'CTAGCCTCAATGGCATCAGTT3' |
| <b>Pdx1</b>   | F5'GCCCCGGTGTAGGCAGTAC3'<br>R5'CAGTGGGCAGGAGGTGCTTA3'        |
| <b>PDK1</b>   | F5'TAAAAGTTCAGACCTTTGGGCC3'<br>R5'TCCCGGCTCTGAATGGTG3'       |
| <b>SST</b>    | F5'CTCTCCCCCAAACCCCATAT3'<br>R5'TTTCTAATGCAGGGTCAAGTTGAG3'   |
| <b>SKP2</b>   | F5'GAAAGCTTCAGCTCTTTCCG 3'<br>R5'AGGCCTTCCAGGCTTAGATT 3'     |
| <b>Smad3</b>  | F5'GCACAGCCACCATGAATTAC3'<br>R5'GGAGGTAGAACTGGCGTCTC3'       |

For the second method, briefly, the relative expression of 84 genes of either the Hedgehog or the BMP/TGF $\beta$  pathways was evaluated using the PAMM-078Z (for the Hedgehog signaling pathway) and PAMM-035Z (for BMP/TGF $\beta$  Pathway). Samples were aliquot in the discs using the CorbettRobotics4 robot and the PCR reaction was performed in the CorbettResearch6000 series cyler using the RT<sup>2</sup> SYBR Green ROX FAST Mastermix (QIAGEN). CT values were exported from the qPCR instrument and analyzed with the  $\Delta\Delta C_t$  method using the online software provided by the manufacturer (<http://pcrdataanalysis.sabiosciences.com/pcr/arrayanalysis.php>). Five control genes, B2M, Hsp90ab1, Gusb, GAPDH, and  $\beta$ -actin present on the PCR array were used for normalization. For gene expression comparison between different age groups, the expression levels were always normalized to the appropriate age-matched controls, the difference in the expression levels reflecting solely the DT-effect on each age group.

#### **Histological and morphometric analyses.**

Histological and morphometrical analyses were performed as previously described<sup>15,16</sup>.

### Statistical analyses.

All mice used in experiments were males of mixed genetic background. Whenever possible, littermates of appropriate genotype were used as age-matched controls. The number of mice per experiment was limited by the availability of the required genotype and age. Criteria of exclusion were: (1) inadequate transgene combination set, (2) gender, (3) evident signs of disease, including hyperglycemia before DT-administration and (4) spontaneous natural death during an experiment. Sample size (scored numbers of mice, islets and cells) is within the range of published literature in the field. Islets and cells were counted on multiple (at least 10) non-consecutive slides. All error bars represent s.d. (standard deviation) except for Extended Data Figures 2f,g & 10d,e, where they indicate the s.e.m. (standard error of mean). P-values are given within figures or figure legends; n values are indicated in supplemental tables or within figures. Each graph corresponds to a supplemental table, which contains the number of mice employed, scored islets/cells and numerical values (average + s.d. or s.e.m.). When indicated, we tested data for normality with the Shapiro-Wilk Normality Test; for large data sets the unpaired t-test with Welch's correction (Welch's test) was used. Statistical analyses were assessed using *Prism v6.0* software, and are summarized in the table below.

For Extended Data Figure 4 we used the  $\chi$ -squared test with 1 degree of freedom to compare observed and estimated data. For qPCR studies, the statistic analyses were performed with either the in-build program mentioned above or with the *RT-PCR analysis macro* (provided by the Genomics Platform, University of Geneva).

| Graph               | Corresponding Table | Error bars        | Statistical tests                         |
|---------------------|---------------------|-------------------|-------------------------------------------|
| Extended Data Fig1f | Supp. Table S2      | s.d.              | No comparison performed                   |
| Extended Data Fig1g | Supp. Table S3      | Individual points | One way Anova                             |
| Extended Data Fig1i | Supp. Table S4      | s.d.              | One way Anova                             |
| Extended Data Fig1j | Supp. Table S5      | s.d.              | One way Anova                             |
| Extended Data Fig2f | Supp. Table S8      | s.e.m.            | No comparison performed                   |
| Extended Data Fig2g | Supp. Table S9      | s.e.m.            | Welch's test                              |
| Extended Data Fig2h | Supp. Table S10     | s.d.              | Welch's test, one way Anova, Mann-Whitney |
| Extended Data Fig3a | Supp. Table S11     | s.d.              | Welch's test, one way Anova, Mann-Whitney |
| Extended Data Fig3d | Supp. Table S12     | Individual points | No comparison performed                   |
| Figure 2b           | Supp. Table S13     | s.d.              | Welch's test and Mann Whitney             |
| Figure 2d           | Supp. Table S15     | s.d.              | Welch's test and Mann Whitney             |
| Figure 2e           | Supp. Table S16     | s.d.              | Welch's test and Mann Whitney             |
| Extended Data Fig5b | Supp. Table S18     | s.d.              | Welch's test and Mann Whitney             |
| Extended Data Fig5c | Supp. Table S19     | s.d.              | Welch's test                              |
| Extended Data Fig5d | Supp. Table S20     | s.d.              | unpaired t-test, two-tailed               |
| Extended Data Fig5g | Supp. Table S21     | Individual points | unpaired t-test, two-tailed               |
| Extended Data Fig5h | Supp. Table S22     | s.d.              | unpaired t-test, two-tailed               |
| Extended Data Fig8b | Supp. Table S24     | s.d.              | Welch's test                              |
| Extended Data Fig8c | Supp. Table S25     | s.d.              | Welch's test and one way Anova            |
| Extended Data Fig8e | Supp. Table S26     | s.d.              | No comparison performed                   |

|                             |                 |        |                                |
|-----------------------------|-----------------|--------|--------------------------------|
| <b>Extended Data Fig8f</b>  | Supp. Table S27 | s.d.   | No comparison performed        |
| <b>Extended Data Fig8i</b>  | Supp. Table S28 | s.d.   | Welch's test and Mann-Whitney  |
| <b>Extended Data Fig8j</b>  | Supp. Table S28 | s.d.   | Welch's test and one way Anova |
| <b>Extended Data Fig10b</b> | Supp. Table S30 | s.d.   | No comparison performed        |
| <b>Extended Data Fig10c</b> | Supp. Table S31 | s.d.   | Welch's test                   |
| <b>Extended Data Fig10d</b> | Supp. Table S32 | s.e.m. | No comparison performed        |
| <b>Figure 3f</b>            | Supp. Table S33 | s.d.   | Welch's test and Mann-Whitney  |
| <b>Figure 3g</b>            | Supp. Table S34 | s.d.   | Welch's test, Mann Whitney     |
| <b>Figure 3h</b>            | Supp. Table S35 | s.d.   | Welch's test                   |
| <b>Extended Data Fig10e</b> | Supp. Table S36 | s.e.m. | No comparison performed        |
| <b>Extended Data Fig10f</b> | Supp. Table S37 | s.d.   | No comparison performed        |
|                             | Supp. Table S38 |        |                                |
|                             | Supp. Table S39 |        |                                |

### Supplementary references.

- 1 Thorel, F. *et al.* Conversion of adult pancreatic alpha-cells to beta-cells after extreme beta-cell loss. *Nature* **464**, 1149-1154 (2010).
- 2 Perl, A. K., Wert, S. E., Nagy, A., Lobe, C. G. & Whitsett, J. A. Early restriction of peripheral and proximal cell lineages during formation of the lung. *Proceedings of the National Academy of Sciences of the United States of America* **99**, 10482-10487, doi:10.1073/pnas.152238499 (2002).
- 3 Srinivas, S. *et al.* Cre reporter strains produced by targeted insertion of EYFP and ECFP into the ROSA26 locus. *BMC developmental biology* **1**, 4 (2001).
- 4 Madisen, L. *et al.* A robust and high-throughput Cre reporting and characterization system for the whole mouse brain. *Nature neuroscience* **13**, 133-140, doi:10.1038/nn.2467 (2010).
- 5 Mellitzer, G. *et al.* Pancreatic islet progenitor cells in neurogenin 3-yellow fluorescent protein knock-add-on mice. *Molecular endocrinology* **18**, 2765-2776 (2004).
- 6 Herrera, P. L. Adult insulin- and glucagon-producing cells differentiate from two independent cell lineages. *Development* **127**, 2317-2322 (2000).
- 7 Wang, S. *et al.* Sustained Neurog3 expression in hormone-expressing islet cells is required for endocrine maturation and function. *Proceedings of the National Academy of Sciences of the United States of America* **106**, 9715-9720, doi:10.1073/pnas.0904247106 (2009).
- 8 Buch, T. *et al.* A Cre-inducible diphtheria toxin receptor mediates cell lineage ablation after toxin administration. *Nature methods* **2**, 419-426, doi:10.1038/nmeth762 (2005).
- 9 Gu, G., Dubauskaite, J. & Melton, D. A. Direct evidence for the pancreatic lineage: NGN3+ cells are islet progenitors and are distinct from duct progenitors. *Development* **129**, 2447-2457 (2002).



- 10 Hu He, K. H. *et al.* In vivo conditional Pax4 overexpression in mature islet beta-cells prevents stress-induced hyperglycemia in mice. *Diabetes* **60**, 1705-1715, doi:10.2337/db10-1102 (2011).
- 11 Nagashima, T. *et al.* Discovery of novel forkhead box O1 inhibitors for treating type 2 diabetes: improvement of fasting glycemia in diabetic db/db mice. *Molecular pharmacology* **78**, 961-970, doi:10.1124/mol.110.065714 (2010).
- 12 Tanaka, H. *et al.* Effects of the novel Foxo1 inhibitor AS1708727 on plasma glucose and triglyceride levels in diabetic db/db mice. *European journal of pharmacology* **645**, 185-191, doi:10.1016/j.ejphar.2010.07.018 (2010).
- 13 Bonal, C. B. *et al.* Nogo-A downregulation improves insulin secretion in mice. *Diabetes* **62**, 1443-1452, doi:10.2337/db12-0949 (2013).
- 14 Mathe, Z. *et al.* Tetracycline-regulated expression of VEGF-A in beta cells induces angiogenesis: improvement of engraftment following transplantation. *Cell transplantation* **15**, 621-636 (2006).
- 15 Strom, A. *et al.* Unique mechanisms of growth regulation and tumor suppression upon Apc inactivation in the pancreas. *Development* **134**, 2719-2725 (2007).
- 16 Herrera, P. L. *et al.* Embryogenesis of the murine endocrine pancreas; early expression of pancreatic polypeptide gene. *Development* **113**, 1257-1265 (1991).

**Chera et al., Supplementary Tables:**

**Table S1.** Evolution of  $\beta$ -cell mass ( $\mu\text{g}$ ) after  $\beta$ -cell ablation in 2-month-old adults as well as 1-year-old and 1.5 year-old aged animals:

| Cells [text]                          | Age at DT-administration | Time point   | # of mice | Mean $\pm$ SD                             |
|---------------------------------------|--------------------------|--------------|-----------|-------------------------------------------|
| $\beta$ -cell mass ( $\mu\text{g}$ ): | 2-month-old              | 0.5 mpa      | 4         | 5.3 $\pm$ 05 (0.30%)                      |
|                                       |                          | 1 mpa        | 4         | 21.2 $\pm$ 4.0 (1.21%)                    |
|                                       |                          | 7 mpa        | 4         | 83.9 $\pm$ 13.0 (4.7%)                    |
|                                       | 1-year-old               | 0.5 mpa      | 5         | 23 $\pm$ 2.6 (0.34%)                      |
|                                       |                          | 1 mpa        | 5         | 85.3 $\pm$ 6.3 (1.26%)                    |
|                                       |                          | 7 mpa        | 5         | 299 $\pm$ 25.4 (4.40%)                    |
|                                       |                          | 14 mpa       | 8         | COMBINED:<br>748.39 $\pm$ 203.80 (11.05%) |
|                                       |                          |              |           | RECOVERED:<br>855.10 $\pm$ 54.12 (12.63%) |
|                                       |                          |              |           | DIABETIC:<br>428.25 $\pm$ 52.99 (6.32%)   |
|                                       |                          | 1.5-year-old | 0.5 mpa   | 3                                         |
|                                       | 1 mpa                    |              | 3         | 94.1 $\pm$ 12.4 (1.21%)                   |
|                                       | 7 mpa                    |              | 3         | 338 $\pm$ 25.6 (4.79%)                    |
|                                       | 14 mpa                   |              | 8         | COMBINED:<br>784.24 $\pm$ 219.09 (10.04%) |
|                                       |                          |              |           | RECOVERED:<br>901.07 $\pm$ 33.38 (11.54%) |
|                                       |                          |              |           | DIABETIC:<br>433.74 $\pm$ 53.15 (5.55%)   |

**Table S2.** Proliferating insulin+ cells in 1.5-year-old mice, before and after  $\beta$ -cell ablation:

| Cells<br>[Figure S1f] | Age at DT-administration | Time point | # of mice | # of scored insulin+ cells | Mean $\pm$ SD  |
|-----------------------|--------------------------|------------|-----------|----------------------------|----------------|
| Ki67+/Ins+ (%)        | 1.5-year-old             | no DT      | 8         | 39,790                     | 1.51 $\pm$ 0.6 |
|                       |                          | 0.5 mpa    | 6         | 938                        | 0.23 $\pm$ 0.2 |

**Table S3.** Glucagon+/Insulin+ bihormonal cells in adult (2-month-old) and aged animals (1- and 1.5-year-old) before and after  $\beta$ -cell ablation:

| Cells<br>[Figure S1g] | Age at DT-administration | Time point | # of mice | # of scored insulin+ cells | Mean $\pm$ SD    |
|-----------------------|--------------------------|------------|-----------|----------------------------|------------------|
| Glu+/Ins+ (%)         | 2-month-old              | no DT      | 3         | 3,021                      | 0.13 $\pm$ 0.14  |
|                       |                          | 0.5 mpa    | 5         | 70                         | 20.36 $\pm$ 4.98 |
|                       |                          | 1 mpa      | 4         | 136                        | 42.65 $\pm$ 6.08 |
|                       |                          | 7 mpa      | 5         | 622                        | 22.1 $\pm$ 3.49  |
|                       | 1-year-old               | no DT      | 3         | 3,994                      | 0.14 $\pm$ 0.13  |
|                       |                          | 0.5 mpa    | 5         | 93                         | 15.07 $\pm$ 3.63 |
|                       |                          | 1 mpa      | 6         | 197                        | 40.84 $\pm$ 8.40 |
|                       |                          | 7 mpa      | 5         | 450                        | 20.8 $\pm$ 4.73  |
|                       | 1.5-year-old             | no DT      | 3         | 5,791                      | 0.21 $\pm$ 0.06  |
|                       |                          | 0.5 mpa    | 6         | 151                        | 15.43 $\pm$ 9.94 |
|                       |                          | 1 mpa      | 4         | 224                        | 39.97 $\pm$ 14.2 |
|                       |                          | 7 mpa      | 6         | 733                        | 17.93 $\pm$ 3.72 |

**Table S4.** Conditional  $\alpha$ -cell lineage tracing (*Glucagon-rtTA, TetO-Cre, R26-YFP, RIP-DTR* mice) in adult (2-month-old) and aged animals (1- and 1.5-year-old). DOX administered BEFORE DT-induced ablation:

| Cells<br>[Figure S1i] | Age at DT-administration | Time point | # of mice | # of scored insulin+ cells | Mean $\pm$ SD     |
|-----------------------|--------------------------|------------|-----------|----------------------------|-------------------|
| YFP+/Ins+ (%)         | 2-month-old              | no DT      | 3         | 6,917                      | 0.26 $\pm$ 0.07   |
|                       |                          | 1 mpa      | 5         | 354                        | 62.26 $\pm$ 16.56 |
|                       |                          | 7 mpa      | 5         | 1,273                      | 82.45 $\pm$ 12.90 |
|                       | 1-year-old               | no DT      | 3         | 8,887                      | 0.27 $\pm$ 0.08   |
|                       |                          | 1 mpa      | 3         | 307                        | 59.36 $\pm$ 13.04 |
|                       |                          | 7 mpa      | 5         | 1,724                      | 80.74 $\pm$ 11.74 |
|                       | 1.5-year-old             | no DT      | 3         | 21,308                     | 0.28 $\pm$ 0.06   |
|                       |                          | 1 mpa      | 3         | 357                        | 57.14 $\pm$ 12.53 |
|                       |                          | 7 mpa      | 5         | 2,031                      | 80.61 $\pm$ 11.42 |

**Table S5.** Conditional  $\alpha$ -cell lineage tracing (*Glucagon-rtTA, TetO-Cre, R26-YFP, RIP-DTR* mice) aged animals (1- and 1.5-year-old). DOX administered AFTER DT-induced ablation:

| Cells<br>[Figure S1k] | Age at DT-administration | Time point | # of mice | # of scored insulin+ cells | Mean $\pm$ SD    |
|-----------------------|--------------------------|------------|-----------|----------------------------|------------------|
| YFP+/Ins+ (%)         | 1-year-old               | no DT      | 5         | 5,117                      | 0.26 $\pm$ 0.04  |
|                       |                          | 7 mpa      | 5         | 1,970                      | 16.15 $\pm$ 6.43 |
|                       | 1.5-year-old             | no DT      | 5         | 42,500                     | 0.27 $\pm$ 0.07  |
|                       |                          | 7 mpa      | 5         | 2,179                      | 15.62 $\pm$ 5.5  |

**Table S6.** Evolution of  $\beta$ -cell mass ( $\mu$ g) after  $\beta$ -cell ablation in 2-week-old pups, and in unablated controls (no DT) of the corresponding age:

| Cells<br>[Figure 1c]           | Age at DT-administration | Time point     | # of mice | Mean $\pm$ SD         |
|--------------------------------|--------------------------|----------------|-----------|-----------------------|
| $\beta$ -cell mass ( $\mu$ g): | 2-week-old               | no DT (1mo)    | 5         | 948.13 $\pm$ 204.36   |
|                                |                          | 0.5 mpa        | 5         | 13.3 $\pm$ 2.25       |
|                                |                          | no DT (4.5mo)  | 5         | 2,707.5 $\pm$ 587.01  |
|                                |                          | 4 mpa          | 5         | 608.26 $\pm$ 61.4     |
|                                |                          | no DT (15.5mo) | 4         | 6917.05 $\pm$ 669.6   |
|                                |                          | 15 mpa         | 4         | 3232.79 $\pm$ 1119.34 |

**Table S7.** Conditional  $\alpha$ -cell lineage tracing (*Glucagon-rtTA*, *TetO-Cre*, *R26-YFP*, *RIP-DTR* mice) in pups (2-week-old) treated with DOX before DT-induced ablation:

| Cells<br>[text, Fig1d] | Age at DT-administration | Time point | # of mice | # of scored insulin+ cells | Mean $\pm$ SD  |
|------------------------|--------------------------|------------|-----------|----------------------------|----------------|
| YFP+/Ins+ (%)          | 2-week-old               | no DT      | 4         | 7541                       | 0.25 $\pm$ 0.1 |
|                        |                          | 1.5 mpa    | 5         | 854                        | 0.23 $\pm$ 0.3 |

**Table S8.** Bihormonal glucagon+/insulin+ cells after 2 sequential episodes of massive  $\beta$ -cell ablation:

| Cells<br>[Figure S2f] | Age at DT-administration         | Time point                    | # of mice | # of scored insulin+ cells | Mean $\pm$ SEM |
|-----------------------|----------------------------------|-------------------------------|-----------|----------------------------|----------------|
| Glu+/Ins+ (%)         | 2-week-old<br>AND<br>5-month-old | 1 mpa<br>(2 <sup>nd</sup> DT) | 2         | 40                         | 30.6 $\pm$ 2.8 |

**Table S9.** Proliferating insulin+ cells (insulin+ cells with Ki67+ nuclei) before and after  $\beta$ -cell ablation at 2 weeks of age:

| Cells<br>[Figure S2g] | Age at DT-administration | Time point     | # of mice | # of scored insulin+ cells | Mean $\pm$ SEM  |
|-----------------------|--------------------------|----------------|-----------|----------------------------|-----------------|
| Ki67+/Ins+ (%)        | 2-week-old               | no DT<br>(1mo) | 3         | 6,006                      | 2.05 $\pm$ 0.67 |
|                       |                          | 0.5 mpa        | 5         | 412                        | 0.40 $\pm$ 0.24 |
|                       |                          | No DT<br>(2mo) | 3         | 6,358                      | 1.80 $\pm$ 0.5  |
|                       |                          | 1.5 mpa        | 3         | 675                        | 0               |

**Table S10.** Number of Ki67+ cells per islet section before and after  $\beta$ -cell ablation in pups (2-week-old), adults (2-month-old) and aged (1.5-year-old) mice:

| Cells<br>[Figure S2h] | Age at DT-<br>administration | Time point        | # of<br>mice | # of scored<br>islets | Mean $\pm$ SD   |
|-----------------------|------------------------------|-------------------|--------------|-----------------------|-----------------|
| Ki67+ (#)             | 2-week-old                   | no DT<br>(1mo)    | 3            | 95                    | 2.5 $\pm$ 0.91  |
|                       |                              | 0.5 mpa           | 6            | 333                   | 8.8 $\pm$ 0.97  |
|                       |                              | no DT<br>(1.5mo)  | 3            | 94                    | 2.1 $\pm$ 1.19  |
|                       |                              | 1 mpa             | 3            | 91                    | 4.0 $\pm$ 0.93  |
|                       |                              | no DT<br>(2mo)    | 3            | 90                    | 1.97 $\pm$ 1.23 |
|                       |                              | 1.5 mpa           | 3            | 90                    | 1.12 $\pm$ 0.25 |
|                       | 2-month-old                  | no DT<br>(2.5mo)  | 3            | 89                    | 1.90 $\pm$ 0.95 |
|                       |                              | 0.5 mpa           | 3            | 76                    | 1.53 $\pm$ 0.52 |
|                       |                              | no DT<br>(3mo)    | 3            | 91                    | 1.56 $\pm$ 0.98 |
|                       |                              | 1 mpa             | 3            | 77                    | 1.8 $\pm$ 0.71  |
|                       |                              | no DT<br>(3.5mo)  | 3            | 93                    | 2.11 $\pm$ 0.8  |
|                       |                              | 1.5 mpa           | 3            | 81                    | 1.23 $\pm$ 0.21 |
|                       | 1.5-year-old                 | no DT<br>(18.5mo) | 3            | 83                    | 1.40 $\pm$ 0.52 |
|                       |                              | 0.5 mpa           | 3            | 74                    | 0.9 $\pm$ 0.29  |
|                       |                              | no DT<br>(19mo)   | 3            | 83                    | 1.16 $\pm$ 0.58 |
|                       |                              | 1 mpa             | 3            | 81                    | 0.35 $\pm$ 0.2  |
|                       |                              | no DT<br>(19.5mo) | 3            | 88                    | 1.1 $\pm$ 0.21  |
|                       |                              | 1.5 mpa           | 3            | 77                    | 0.61 $\pm$ 0.31 |

**Table S11.** Number of somatostatin positive cells per islet section during the first 1.5 months post-ablation in pups (2-week-old):

| Cells<br>[Figure S3a] | Age at DT-administration | Time point | # of mice | Scored islets | Mean $\pm$ SD    |
|-----------------------|--------------------------|------------|-----------|---------------|------------------|
| Sst+ (#)              | 2-week-old               | no DT      | 7         | 255           | 13.19 $\pm$ 4.76 |
|                       |                          | 3 dpa      | 5         | 240           | 11.53 $\pm$ 4.63 |
|                       |                          | 5 dpa      | 5         | 228           | 11.93 $\pm$ 4.19 |
|                       |                          | 7 dpa      | 5         | 251           | 9.85 $\pm$ 4.53  |
|                       |                          | 0.5 mpa    | 6         | 267           | 2.9 $\pm$ 1.83   |
|                       |                          | 1 mpa      | 5         | 266           | 7.1 $\pm$ 3.07   |
|                       |                          | 1.5 mpa    | 5         | 206           | 11.39 $\pm$ 4.0  |

**Table S12.** Specificity of YFP labeling in the *Sst-Cre*, *R26-YFP*, *RIP-DTR* transgenic line:

| Cells<br>[Figure S3d] | # of mice | # of scored YFP+ cells | Mean $\pm$ SD    |
|-----------------------|-----------|------------------------|------------------|
| Sst+/YFP+ (%)         | 4         | 1,263                  | 80.63 $\pm$ 6.2  |
| Ins+/YFP+ (%)         |           | 1,263                  | 0.95 $\pm$ 0.91  |
| Glu+/YFP+ (%)         |           | 1,263                  | 0.2 $\pm$ 0.14   |
| YFP only              |           | 1,263                  | 17.94 $\pm$ 3.38 |

**Table S13.** YFP-labeled cells with Ki67+ nuclei (*Somatostatin-Cre*, *R26-YFP*, *RIP-DTR* mice) before and after  $\beta$ -cell ablation:

| Cells<br>[Figure 2b] | Age at DT-administration | Time point | # of mice | # of scored YFP+ cells | Mean $\pm$ SD     |
|----------------------|--------------------------|------------|-----------|------------------------|-------------------|
| Ki67+/YFP+ (%)       | 2-week-old               | no DT      | 6         | 2,754                  | 2.83 $\pm$ 0.4    |
|                      |                          | 0.5 mpa    | 6         | 3,146                  | 80.25 $\pm$ 14.34 |

**Table S14.** Ki67+ cells labeled with YFP (*Somatostatin-Cre*, *R26-YFP*, *RIP-DTR* mice) after  $\beta$ -cell ablation:

| Cells<br>[text] | Age at DT-administration | Time point | # of mice | # of scored Ki67+ cells | Mean $\pm$ SD   |
|-----------------|--------------------------|------------|-----------|-------------------------|-----------------|
| YFP+/Ki67+ (%)  | 2-week-old               | 0.5 mpa    | 6         | 2,947                   | 85.3 $\pm$ 7.65 |

**Table S15.** Insulin+ cells labeled with YFP (*Somatostatin-Cre, R26-YFP, RIP-DTR* mice) before and after  $\beta$ -cell ablation:

| Cells<br>[Figure 2d] | Age at DT-administration | Time point | # of mice | # of scored insulin+ cells | Mean $\pm$ SD   |
|----------------------|--------------------------|------------|-----------|----------------------------|-----------------|
| YFP+/ins+ (%)        | 2-week-old               | no DT      | 3         | 6,480                      | 0.03 $\pm$ 0.03 |
|                      |                          | 1.5 mpa    | 7         | 1,592                      | 89.4 $\pm$ 6.8  |

**Table S16.** Cell fate of YFP-traced cells (*Somatostatin-Cre, R26-YFP, RIP-DTR* mice) before and after  $\beta$ -cell ablation:

| Cells<br>[Figure 2e] | Age at DT-administration | Time point | # of mice | # of scored YFP+ cells | Mean $\pm$ SD    |
|----------------------|--------------------------|------------|-----------|------------------------|------------------|
| Sst+/YFP+ (%)        | 2-week-old               | no DT      | 3         | 1,673                  | 99.94 $\pm$ 0.1  |
|                      |                          | 1.5 mpa    | 5         | 2,295                  | 54.81 $\pm$ 3.4  |
| Ins+/YFP+ (%)        | 2-week-old               | no DT      | 3         | 1,673                  | 0.06 $\pm$ 0.1   |
|                      |                          | 1.5 mpa    | 5         | 2,295                  | 44.23 $\pm$ 4.03 |

**Table S17.** Somatostatin+/insulin+ bihormonal cells in pups (2-week-old) at 1.5 months post-ablation:

| Cells<br>[text] | Age at DT-administration | Time point | # of mice | # of scored insulin+ cells | Mean $\pm$ SEM  |
|-----------------|--------------------------|------------|-----------|----------------------------|-----------------|
| Sst+/Ins+ (%)   | 2-week-old               | 1.5 mpa    | 7         | 1,592                      | 0.83 $\pm$ 0.33 |

**Table S18.** Number of  $\beta$ -cells per islet section at 0.5 months after either streptozotocin (STZ) treatment (200 $\mu$ g/g) or diphtheria toxin (DT) treatment in pups:

| Cells<br>[Figure S5b] | Treatment | Age at ablation | Time point | # of mice | Scored islets | Mean $\pm$ SD   |
|-----------------------|-----------|-----------------|------------|-----------|---------------|-----------------|
| $\beta$ -cells (#)    | STZ       | 2-week-old      | 0.5 mpa    | 3         | 87            | 14.08 $\pm$ 5   |
|                       | DT        |                 |            | 4         | 361           | 0.94 $\pm$ 0.84 |



**Table S19.** Number of YFP+Ins+ cells per islet section at 0.5 months, following either streptozotocin (STZ) treatment (200µg/g) or DT treatment in pups:

| Cells<br>[Figure S5c] | Treatment | Age at ablation | Time point | # of mice | Scored islets | Mean ± SD   |
|-----------------------|-----------|-----------------|------------|-----------|---------------|-------------|
| YFP+Ins+ (#)          | STZ       | 2-week-old      | 1.5 mpa    | 3         | 88            | 5.80 ± 2.87 |
|                       | DT        |                 |            | 7         | 193           | 7.41 ± 2.06 |

**Table S20.** Number of somatostatin+ cells per islet section during the first month post-ablation in adults (2-month-old):

| Cells<br>[Figure S5d] | Age at DT-administration | Time point | # of mice | Scored islets | Mean ± SD    |
|-----------------------|--------------------------|------------|-----------|---------------|--------------|
| Sst+ (#)              | 2-month-old              | no DT      | 3         | 174           | 8.87 ± 2.01  |
|                       |                          | 0.5 mpa    | 4         | 140           | 10.19 ± 4.16 |
|                       |                          | 1 mpa      | 3         | 86            | 8.38 ± 2.62  |

**Table S21.** Insulin+ cells labeled with YFP (*Somatostatin-Cre, R26-YFP, RIP-DTR* mice) before and after β-cell ablation:

| Cells<br>[Figure S5g] | Age at DT-administration | Time point | # of mice | # of scored insulin+ cells | Mean ± SD     |
|-----------------------|--------------------------|------------|-----------|----------------------------|---------------|
| YFP+/ins+ (%)         | 2-month-old              | no DT      | 4         | 9,562                      | 0.14 ± 0.15   |
|                       |                          | 1.5 mpa    | 8         | 149                        | 17.08 ± 14.54 |

**Table S22.** Cell fate of YFP-traced cells (*Somatostatin-Cre, R26-YFP, RIP-DTR* mice) before and after β-cell ablation:

| Cells<br>[Figure S5h] | Age at DT-administration | Time point | # of mice | # of scored YFP+ cells | Mean ± SD     |
|-----------------------|--------------------------|------------|-----------|------------------------|---------------|
| Sst+/YFP+ (%)         | 2-month-old              | no DT      | 4         | 1,263                  | 80.63 ± 6.2   |
|                       |                          | 1.5 mpa    | 8         | 1,342                  | 97.53 ± 1.95  |
| Ins+/YFP+ (%)         | 2-month-old              | no DT      | 4         | 1,263                  | 0.95 ± 0.91   |
|                       |                          | 1.5 mpa    | 8         | 1,342                  | 17.08 ± 14.54 |

**Table S23.** Insulin+ cells with Ki67+ nuclei after  $\beta$ -cell ablation:

| Cells<br>[Figure S7] | Age at DT-administration | Time point | # of mice | # of scored insulin+ cells | Mean $\pm$ SEM |
|----------------------|--------------------------|------------|-----------|----------------------------|----------------|
| Ki67+/Ins+ (%)       | 2-week-old               | 3 mpa      | 1         | 162                        | 53.7%          |
|                      |                          | 3.3 mpa    | 1         | 89                         | 4.5%           |
|                      |                          | 4 mpa      | 1         | 175                        | 73.7%          |

**Table S24.** Insulin+ cells labeled with YFP (*Ngn3-YFP*, *RIP-DTR* mice) before and after  $\beta$ -cell ablation:

| Cells<br>[Figure S8b] | Age at DT-administration | Time point | # of mice | # of scored insulin+ cells | Mean $\pm$ SD  |
|-----------------------|--------------------------|------------|-----------|----------------------------|----------------|
| YFP+/ins+ (%)         | 2-week-old               | no DT      | 3         | 6,358                      | 0              |
|                       |                          | 1.5 mpa    | 3         | 675                        | 86.4 $\pm$ 4.8 |

**Table S25.** YFP-labeled cells positive for insulin (*Ngn3-YFP*, *RIP-DTR* mice) after  $\beta$ -cell ablation:

| Cells<br>[Figure S8c] | Age of DT-administration | Time point | # of mice | # of scored YFP+ cells | Mean $\pm$ SD   |
|-----------------------|--------------------------|------------|-----------|------------------------|-----------------|
| ins+/YFP+ (%)         | 2-week-old               | 0.5 mpa    | 3         | 31                     | 9.97 $\pm$ 0.31 |
|                       |                          | 1 mpa      | 3         | 123                    | 33.3 $\pm$ 9.7  |
|                       |                          | 1.5 mpa    | 3         | 729                    | 80.9 $\pm$ 15   |
|                       |                          | 2 mpa      | 3         | 47                     | 8.17 $\pm$ 5.35 |

**Table S26.** Insulin+ cells labeled with YFP (*Ngn3-CreERT*, *R26-YFP*, *RIP-DTR* mice) before and after  $\beta$ -cell ablation:

| Cells<br>[Figure S8e] | Age at DT-administration | Time point | # of mice | # of scored insulin+ cells | Mean $\pm$ SD   |
|-----------------------|--------------------------|------------|-----------|----------------------------|-----------------|
| YFP+/ins+ (%)         | 2-week-old               | no DT      | 3         | 3,472                      | 0               |
|                       |                          | 1.5 mpa    | 3         | 489                        | 90.76 $\pm$ 1.8 |

**Table S27.** YFP-labeled cells positive for insulin (*Ngn3-CreERT*, *R26-YFP*, *RIP-DTR* mice) after  $\beta$ -cell ablation:

| Cells<br>[Figure S8f] | Age at DT-administration | Time point | # of mice | # of scored YFP+ cells | Mean $\pm$ SD   |
|-----------------------|--------------------------|------------|-----------|------------------------|-----------------|
| ins+/YFP+ (%)         | 2-week-old               | 1.5 mpa    | 3         | 478                    | 92.9 $\pm$ 5.74 |

**Table S28.** Number of insulin+ cells per islet section, with or without DOX treatment, in *Ngn3-tTA*, *Tre-Ngn3*, *RIP-DTR* pups at 1.5 months post DT-ablation:

| Cells<br>[Figure S8i] | Treatment | Age at DT-administration | Time point | # of mice | Scored islets | Mean $\pm$ SD   |
|-----------------------|-----------|--------------------------|------------|-----------|---------------|-----------------|
| Ins <sup>+</sup> (#)  | + DOX     | 2-week-old               | 1.5 mpa    | 4         | 167           | 0.71 $\pm$ 0.85 |
|                       | no DOX    |                          |            | 3         | 266           | 8.29 $\pm$ 2.8  |

**Table S29.** Glucagon+/ Insulin+ bihormonal cells in *Ngn3-tTA*, *Tre-Ngn3*, *RIP-DTR* pups (2-week-old), with or without DOX treatment, at 1.5 months post DT-ablation:

| Cells<br>[Figure S8j] | Treatment | Age at DT-administration | Time point | # of mice | # of scored insulin+ cells | Mean $\pm$ SD     |
|-----------------------|-----------|--------------------------|------------|-----------|----------------------------|-------------------|
| Glu+/Ins+ (%)         | + DOX     | 2-week-old               | No DT      | 3         | 9,233                      | 0.16 $\pm$ 0.05   |
|                       | no DOX    |                          | 1.5 mpa    | 3         | 1,385                      | 0                 |
|                       | + DOX     |                          | 1.5 mpa    | 4         | 141                        | 40.71 $\pm$ 12.88 |

**Table S30.** Cell fate of YFP-traced cells (*Somatostatin-Cre, R26-YFP, RIP-DTR* mice) in adults with or without FoxO1 inhibitor treatment:

| Cells<br>[Figure S10b] | Age         | Treatment | Time point | # of mice | # of scored YFP+ cells | Mean $\pm$ SD    |
|------------------------|-------------|-----------|------------|-----------|------------------------|------------------|
| Sst+/YFP+ (%)          | 2-month-old | -         | No DT      | 4         | 1,224                  | 92.84 $\pm$ 3.86 |
|                        |             | AS1842856 | No DT      | 3         | 1,347                  | 65.92 $\pm$ 3.45 |
| Ins+/YFP+ (%)          |             | -         | No DT      | 4         | 1,224                  | 0.91 $\pm$ 0.85  |
|                        |             | AS1842856 | No DT      | 3         | 1,347                  | 5.23 $\pm$ 3.45  |
| YFP+ only (%)          |             | -         | No DT      | 4         | 1,224                  | 6.25 $\pm$ 3.24  |
|                        |             | AS1842856 | No DT      | 3         | 1,347                  | 28.85 $\pm$ 6.17 |

**Table S31.** Insulin+ cells labeled with YFP (*Somatostatin-CRE, R26-YFP, RIP-DTR* mice) in adults with or without transient FoxO1 inhibitor (AS1842856) treatment:

| Cells<br>[Figure S10c] | Age         | Treatment | Time point | # of mice | # of scored insulin+ cells | Mean $\pm$ SD   |
|------------------------|-------------|-----------|------------|-----------|----------------------------|-----------------|
| YFP+/ins+ (%)          | 2-month-old | -         | No DT      | 4         | 9,562                      | 0.14 $\pm$ 0.15 |
|                        |             | AS1842856 |            | 3         | 3,249                      | 2.45 $\pm$ 1.82 |

**Table S32.** YFP-labeled cells positive for glucagon (*Somatostatin-Cre, R26-YFP, RIP-DTR* mice) in adults transiently treated with FoxO1 inhibitor (AS1842856):

| Cells<br>[Figure S10d] | Age at DT-administration | Treatment | Time point | # of mice | # of scored YFP+ cells | Mean $\pm$ SEM  |
|------------------------|--------------------------|-----------|------------|-----------|------------------------|-----------------|
| Glu+/YFP (%)           | 2-month-old              | AS1842856 | No DT      | 2         | 728                    | 0.69 $\pm$ 0.21 |

**Table S33.** Number of insulin+ cells per islet section at in adults at 1 month after  $\beta$ -cell ablation and transient FoxO1 inhibitor (AS1842856) treatment:

| Cells<br>[Figure 3f] | Age at DT-administration | Treatment | Time point | # of mice | Scored islets | Mean $\pm$ SD   |
|----------------------|--------------------------|-----------|------------|-----------|---------------|-----------------|
| Ins+ (#)             | 2-month-old              | -         | 1 mpa      | 3         | 95            | 0.41 $\pm$ 0.49 |
|                      |                          | AS1842856 |            | 4         | 190           | 4.71 $\pm$ 2.9  |

**Table S34.** Insulin+ cells labeled with YFP (*Somatostatin-CRE, R26-YFP, RIP-DTR* mice) in adults at 1 month after  $\beta$ -cell ablation with or without transient FoxO1 inhibitor (AS1842856) treatment:

| Cells<br>[Figure 3g] | Age at DT-administration | Treatment | Time point | # of mice | # of scored insulin+ cells | Mean $\pm$ SD    |
|----------------------|--------------------------|-----------|------------|-----------|----------------------------|------------------|
| YFP+/ins+ (%)        | 2-month-old              | -         | 1 mpa      | 6         | 370                        | 4.95 $\pm$ 3.31  |
|                      |                          | AS1842856 |            | 4         | 894                        | 93.49 $\pm$ 2.73 |

**Table S35.** Cell fate of YFP-traced cells (*Somatostatin-Cre, R26-YFP, RIP-DTR* mice) in adults at 1 month after  $\beta$ -cell ablation with or without FoxO1 inhibitor treatment:

| Cells<br>[Figure 3h] | Age at DT-administration | Treatment | Time point | # of mice | # of scored YFP+ cells | Mean $\pm$ SD    |
|----------------------|--------------------------|-----------|------------|-----------|------------------------|------------------|
| Sst+/YFP+ (%)        | 2-month-old              | -         | 1 mpa      | 6         | 2,559                  | 94.30 $\pm$ 4.31 |
|                      |                          | AS1842856 | 1 mpa      | 4         | 3,538                  | 64.22 $\pm$ 1.49 |
| Ins+/YFP+ (%)        |                          | -         | 1 mpa      | 6         | 2,559                  | 0.39 $\pm$ 0.24  |
|                      |                          | AS1842856 | 1 mpa      | 4         | 3,538                  | 23.57 $\pm$ 1.25 |
| YFP+ only (%)        |                          | -         | 1 mpa      | 6         | 2,559                  | 5.31 $\pm$ 4.53  |
|                      |                          | AS1842856 | 1 mpa      | 4         | 3,538                  | 12.21 $\pm$ 1.15 |

**Table S36.** YFP-labeled cells positive for glucagon (*Somatostatin-Cre, R26-YFP, RIP-DTR* mice) in adults at 1 month after  $\beta$ -cell ablation and transient FoxO1 inhibitor (AS1842856) treatment:

| Cells<br>[Figure S10e] | Age at DT-administration | Treatment | Time point | # of mice | # of scored YFP+ cells | Mean $\pm$ SD   |
|------------------------|--------------------------|-----------|------------|-----------|------------------------|-----------------|
| Glu+/YFP+ (%)          | 2-month-old              | AS1842856 | 1 mpa      | 2         | 986                    | 0.71 $\pm$ 0.06 |

**Table S37.** Number of insulin+ cells per islet section at in adults at 2 month after  $\beta$ -cell ablation with transient FoxO1 inhibitor (AS1842856) treatment during the 5<sup>th</sup> week of regeneration:

| Cells<br>[Figure S10f] | Age at DT-administration | Treatment | Time point | # of mice | Scored islets | Mean $\pm$ SD   |
|------------------------|--------------------------|-----------|------------|-----------|---------------|-----------------|
| Ins+ (#)/mouse         | 2-month-old              | AS1842856 | 2 mpa      | 3         | 71            | 3.75 $\pm$ 1.57 |

**Table S38.** Insulin+ cells labeled with YFP (*Somatostatin-CRE, R26-YFP, RIP-DTR* mice) in adults at 2 month after  $\beta$ -cell ablation with transient FoxO1 inhibitor (AS1842856) treatment during the 5<sup>th</sup> week of regeneration:

| Cells<br>[Figure S10f] | Age at DT-administration | Treatment | Time point | # of mice | # of scored insulin+ cells | Mean $\pm$ SD    |
|------------------------|--------------------------|-----------|------------|-----------|----------------------------|------------------|
| YFP+/ins+ (%)          | 2-month-old              | AS1842856 | 2 mpa      | 3         | 300                        | 94.32 $\pm$ 2.82 |

**Table S39.** Cell fate of YFP-traced cells (*Somatostatin-Cre, R26-YFP, RIP-DTR* mice) in adults at 1 month after  $\beta$ -cell ablation with transient FoxO1 inhibitor (AS1842856) treatment during the 5<sup>th</sup> week of regeneration:

| Cells<br>[Figure S10f] | Age at DT-administration | Treatment | Time point | # of mice | # of scored YFP+ cells | Mean $\pm$ SD    |
|------------------------|--------------------------|-----------|------------|-----------|------------------------|------------------|
| Sst+/YFP+ (%)          | 2-month-old              | AS1842856 | 2 mpa      | 3         | 1,216                  | 66.37 $\pm$ 3.67 |
| Ins+/YFP+ (%)          |                          | AS1842856 | 2 mpa      | 3         | 1,216                  | 20.89 $\pm$ 7.36 |
| YFP+ only (%)          |                          | AS1842856 | 2 mpa      | 3         | 1,216                  | 12.74 $\pm$ 3.91 |
